# Supplementary material for: Radiative simulation of non-Newtonian MHD fluid over a boundary-driven multi-physical curved mechanism: Keller–Box evidence
Source: Frontiers journal article supplement (doi:10.3389/fphy.2023.1126003), 2023-04-12
Supplement: Data_Sheet_1.pdf [file Data_Sheet_1.pdf]

# Supplementary Material

## 1 APPENDIX

### 1.1 Error Analysis

Theorem: Let  $w_1 = w_1(y, y_1, y_2, y_3)$ ,  $w_2 = w_2(\theta, \theta_1, y, y_1, y_2)$  be differentiable functions, the maximum error attained by the Keller-Box shooting method with Jacobi iterative scheme for Eq. (40) is bounded.

Proof:

Discretize Eqs. (40) using Keller-Box method with Jacobi iterative scheme as follows

$$\begin{aligned}\frac{y_i^{n+1} - y_{i-1}^n}{\delta h} + (y_1)_{i-1/2}^n &= 0, \\ \frac{(y_1)_i^{n+1} - (y_1)_{i-1}^n}{\delta h} + (y_2)_{i-1/2}^n &= 0, \\ \frac{(y_2)_i^{n+1} - (y_2)_{i-1}^n}{\delta h} + (y_3)_{i-1/2}^n &= 0, \\ \frac{(y_3)_i^{n+1} - (y_3)_{i-1}^n}{\delta h} + (W_1)_{i-1/2}^n &= 0\end{aligned}\quad (S1)$$

Let the exact scheme be defined as:

$$\begin{aligned}\frac{y_i^E - y_{i-1}^E}{\delta h} + (y_1)_{i-1/2}^E &= 0, \\ \frac{(y_1)_i^E - (y_1)_{i-1}^E}{\delta h} + (y_2)_{i-1/2}^E &= 0, \\ \frac{(y_2)_i^E - (y_2)_{i-1}^E}{\delta h} + (y_3)_{i-1/2}^E &= 0, \\ \frac{(y_3)_i^E - (y_3)_{i-1}^E}{\delta h} + (W_1)_{i-1/2}^E &= 0,\end{aligned}\quad (S2)$$

such that at any grid point, errors of the solution follow:

$$\begin{aligned}(e_1)_i^n &= y_1^n - y_1^E, \\ (e_2)_i^n &= (y_1)_i^n - (y_1)_i^E, \\ (e_3)_i^n &= (y_2)_i^n - (y_2)_i^E, \\ (e_4)_i^n &= (y_3)_i^n - (y_3)_i^E.\end{aligned}\quad (S3)$$

Applying Mean Value Theorem, one can write

$$\begin{aligned} W_1(y_i^n, (y_1)_i^n, (y_2)_i^n, (y_3)_i^n) &= W_1(y_i^E, (y_1)_i^E, (y_2)_i^E, (y_3)_i^E) \\ &= (\bar{e}_1)_i^n \cdot \nabla W_1(c_1, c_2, c_3), \end{aligned} \quad (S4)$$

in which

$$\begin{aligned} c_1 &= y_i^n + \varepsilon_1(y_2)_1^n, \\ c_2 &= (y_1)_i^n + \varepsilon_2(e_2)_i^n, \\ c_3 &= (y_2)_i^n + \varepsilon_3(e_3)_i^n, \end{aligned} \quad (S5)$$

$c_i \in [0, 1]$  for  $i = 1(1)3$ , and  $(\bar{e}_1)_i^n = [(e_1)_i^n, (e_2)_i^n, (e_3)_i^n]$ .

Convergence error equations follow:

$$\begin{aligned} (e_1)^{n+1} &= (e_1)_{i-1}^n + \delta h(e_1)_{i-1/2}^n, \\ (e_2)_i^{n+1} &= (e_2)_{i-1}^n + \delta h(e_2)_{i-1/2}^n, \\ (e_3)_i^{n+1} &= (e_3)_{i-1}^n + \delta h(\hat{e}_1)_{i-1/2}^n \nabla W_1, \end{aligned} \quad (S6)$$

from Eq. (S6), one can infer the following inequalities

$$\begin{aligned} |(e_1)_i^{n+1}| &\leq |(e_1)_{i-1}^n| + \delta h|(e_2)_{i-1/2}^n|, \\ |(e_2)_i^{n+1}| &\leq |(e_2)_{i-1}^n| + \delta h|(e_3)_{i-1/2}^n|, \\ |(e_3)_i^{n+1}| &\leq |(e_3)_{i-1}^n| + \delta h|(\hat{e}_1)_{i-1/2}^n \cdot \nabla W_1|. \end{aligned} \quad (S7)$$

Setting  $\nabla W_1 = [\bar{W}_1^1, \bar{W}_1^2, \bar{W}_1^3]$ , Eq. (S7) can be expressed as

$$\begin{aligned} |(e_3)_i^{n+1}| &\leq |(e_3)_{i-1}^n| + \delta h|\sum_{j=1}^3 (e_j)_{i-1/2}^n \hat{W}_1^j|, \\ &\leq |(e_3)_{i-1}^n| + \delta h\sum_{j=1}^3 |(e_j)_{i-1/2}^n \bar{W}_1^j|, \end{aligned} \quad (S8)$$

such that

$$\begin{aligned} |(e_3)_i^{n+1}| &\leq |(e_3)_{i-1}^n| + \delta h|\sum_{j=1}^3 (e_j)_{i-1/2}^n \hat{W}_1^j|, \\ &\leq |(e_3)_{i-1}^n| + \delta h\sum_{j=1}^3 |(e_j)_{i-1/2}^n \bar{W}_1^j|. \end{aligned} \quad (S9)$$

Then

$$\begin{aligned} (e_1)_i^n &= \max_{i=1(1)N} |(e_1)_i^n|, \\ (e_2)_i^n &= \max_{i=1(1)N} |(e_2)_i^n|, \\ (e_3)_i^n &= \max_{i=1(1)N} |(e_3)_i^n|, \text{ and} \\ (\bar{e})^n &= \max[\max_{i=1(1)N} (e_1 = 1(1)N)_i^n]. \end{aligned} \quad (S10)$$

where  $N$  represents the number of nodes. Equations. (S8) and (S9) can be written in the form

$$\begin{aligned} e_1^{n+1} &\leq e_1^n + \delta h e_2^n + \bar{M}_1 O(\delta h)^2, \\ e_2^{n+1} &\leq e_2^n + \delta h e_3^n + \bar{M}_2 O(\delta h)^2, \\ \bar{e}^{n+1} &\leq (1 + 4\delta h \Sigma_{j=1}^4 |\bar{W}_1^j|) \bar{e}^n + \bar{M}_3 O(\delta h)^2. \end{aligned} \quad (\text{S11})$$

Evaluating  $n = 0, 1$ , and  $n$  in the above expression, one can write

$$\begin{aligned} \bar{e}^1 &\leq (1 + 4\delta h \Sigma_{j=1}^4 |\bar{W}_1^j|) \bar{e}^0 + \bar{M}_3 O(\delta h)^2, \\ \bar{e}^2 &\leq (1 + 4\delta h \Sigma_{j=1}^4 |\bar{W}_1^j|)^2 \bar{e}^0 + [1 + (1 + 4\delta h \Sigma_{j=1}^4 |\bar{W}_1^j|)] \bar{M}_3 O(\delta h)^2, \\ \bar{e}^n &\leq (1 + 4\delta h \Sigma_{j=1}^4 |\bar{W}_1^j|)^n \bar{e}^0 + [1 + (1 + 4\delta h \Sigma_{j=1}^4 |\bar{W}_1^j|) + \dots, \\ &\quad + (1 + 4\delta h \Sigma_{j=1}^4 |\bar{W}_1^j|)^{n-1}] \bar{M}_3 O(\delta h)^2. \end{aligned} \quad (\text{S12})$$

Taking the sum of the  $n$ th term yields

$$\begin{aligned} \bar{e}^n &\leq (1 + 4\delta h \Sigma_{j=1}^4 |\bar{W}_1^j|)^n \bar{e}^0 + \left( \frac{[1 + 4\delta h \Sigma_{j=1}^4 |\bar{W}_1^j|]^n}{4\delta h \Sigma_{j=1}^4 |\bar{W}_1^j|} \right) \bar{M}_3 O(\delta h)^2, \\ &\leq (1 + 4\delta h \Sigma_{j=1}^4 |\bar{W}_1^j|)^n \bar{e}^0 + EXP(4\delta h \Sigma_{j=1}^4 |\bar{W}_1^j|) \bar{M}_3 O(\delta h)^2. \end{aligned} \quad (\text{S13})$$

By virtue of Eq. (S13), Eq. (S11) becomes

$$\begin{aligned} e_1^n &\leq (1 + \delta h)[(1 + 4\delta h \Sigma_{j=1}^4 |\bar{W}_1^j|)^n \bar{e}^0 + EXP(4(n-1)\delta h \Sigma_{j=1}^4 |\bar{W}_1^j|) \bar{M}_3 O(\delta h)^2], \\ &\quad + \bar{M}_1 O(\delta h)^2, \end{aligned} \quad (\text{S14})$$

$$\begin{aligned} e_2^n &\leq (1 + \delta h)[(1 + 4\delta h \Sigma_{j=1}^4 |\bar{W}_1^j|)^n \bar{e}^0 + EXP(4(n-1)\delta h \Sigma_{j=1}^4 |\bar{W}_1^j|) \bar{M}_3 O(\delta h)^2], \\ &\quad + \bar{M}_2 O(\delta h)^2. \end{aligned} \quad (\text{S15})$$

Equations (S14) and (S15) give the maximum error bounds for Eqs. (44)-(51). Thus, error for Eqs. (33) with the condition expressed in Eqs. (34) and (35) can be shown in the similar way (see [18]).
